# Supplementary material for: Association Between Eating Speed and Metabolic Syndrome: A Systematic Review and Meta-Analysis
Source: PubMed Central journal article supplement (PMC8564065; doi:10.3389/fnut.2021.700936), 2021-10-20
Supplement: Data_Sheet_2.pdf [file Data_Sheet_2.pdf]

## Supplementary Material

### Association between eating speed with metabolic syndrome and its components: a systematic review and meta-analysis

Shu-qian Yuan<sup>1</sup>, Ying-ming Liu<sup>1</sup>, Wei Liang<sup>2,3</sup>, Fei-fei Li<sup>2,3</sup>, Yuan Zeng<sup>1</sup>, Yin-yue Liu<sup>1</sup>, Shu-zhen Huang<sup>1</sup>, Quan-yuan He<sup>1</sup>, Binh Quach<sup>3</sup>, Jiao Jiao<sup>4</sup>, Julien S. Baker<sup>2,3\*</sup>, Yi-de Yang<sup>1\*</sup>

<sup>1</sup>Key Laboratory of Molecular Epidemiology of Hunan Province, School of Medicine, Hunan Normal University, Changsha, 410006, China

<sup>2</sup>Centre for Health and Exercise Science Research, Hong Kong Baptist University, Kowloon Tong 999077, Hong Kong, China;

<sup>3</sup>Department of Sport, Physical Education and Health, Hong Kong Baptist University, Kowloon Tong 999077, Hong Kong, China;

<sup>4</sup>Dr. Stephen Hui Research Centre for Physical Recreation and Wellness, Hong Kong Baptist University, Kowloon Tong 999077, Hong Kong, China.

#### \*Correspondence:

**Yi-de Yang**

[yangyide2007@126.com](mailto:yangyide2007@126.com)

**Julien S Baker**

[jsbaker@hkbu.edu.hk](mailto:jsbaker@hkbu.edu.hk)

#### Contents:

**Table S1.** The detailed characteristics of the studies reporting on the association between eating speed and metabolic syndrome and its components.

**Table S2.** Assessment of the quality of 20 cross-sectional studies the Agency for Healthcare Research and Quality (AHRQ) scale.

**Table S3.** Assessment of the quality of 7 cohort studies and 1 case-control study by Newcastle-Ottawa Scale (NOS).

**Table S4.** Assessment of the quality of 1 randomised controlled trial by Cochrane Scale.

**Table S5.** Begg's test and Egger's test of the included studies in the meta-analysis.

**Figure S1.** Begg's funnel plots of the included studies in the meta-analysis. (Only when the number of included studies was more than 5, the Begg's test and plot were conducted. MetS, metabolic syndrome; BP, blood pressure; FPG, fasting plasma glucose; TG, triglycerides; HDL, high-density lipoprotein)

**Figure S2.** Sensitivity analysis of the included studies in the meta-analysis. (The slow eating group was used as the reference group. MetS, metabolic syndrome; BP, blood pressure; FPG, fasting plasma glucose; TG, triglycerides; HDL, high-density lipoprotein)

**Table S6.** Meta-regression models of multivariable adjusted analyses

**Table S1. The detailed characteristics of the studies reporting on the association between eating speed and metabolic syndrome and its components**

| Reference                                 | Study design          | Country   | sample size (% men) | Age (years)                     | population | Evaluation of eating rate | Category of eating rate                             |                                                      | Outcome                                                                                         | OR/P                                                                                                                                                                                                                                                                                                                                                                                                                                                                                                              |
|-------------------------------------------|-----------------------|-----------|---------------------|---------------------------------|------------|---------------------------|-----------------------------------------------------|------------------------------------------------------|-------------------------------------------------------------------------------------------------|-------------------------------------------------------------------------------------------------------------------------------------------------------------------------------------------------------------------------------------------------------------------------------------------------------------------------------------------------------------------------------------------------------------------------------------------------------------------------------------------------------------------|
|                                           |                       |           |                     |                                 |            |                           | Quickly                                             | Reference                                            |                                                                                                 |                                                                                                                                                                                                                                                                                                                                                                                                                                                                                                                   |
| Pey Sze Teo, et al <sup>45</sup>          | Cross-sectional study | Singapore | 7011(44.8)          | 49.8±13.0                       | adults     | Self-report               | Medium/Fast                                         | Slow                                                 | Abdominal overweight                                                                            | Medium: OR=1.40(1.18-1.67)<br>Fast: OR=1.84(1.52-2.21)                                                                                                                                                                                                                                                                                                                                                                                                                                                            |
| Lixin Tao, et al <sup>23</sup>            | Cross-sectional study | China     | 7972(88.26)         | 29-48                           | adults     | Self-report               | Medium/Fast                                         | Slow                                                 | MetS; central obesity; BP; FPG;TG; HDL                                                          | Medium: OR=1.65(1.32-2.07)<br>Fast: OR=2.27(1.80-2.86)<br>OR=1.39(1.12-1.72)<br>OR=1.68(1.35-2.09)<br>OR=1.57(1.28-1.92)<br>OR=1.82(1.48-2.24)<br>OR=1.11(0.88-1.41)<br>OR=1.18(0.93-1.51)<br>OR=1.25(1.00-1.55)<br>OR=1.51(1.21-1.88)<br>OR=1.22(1.02-1.45)<br>OR=1.33(1.11-1.60)                                                                                                                                                                                                                                |
| Chikanobu Sonoda, et al <sup>46</sup>     | Cross-sectional study | Japan     | 863(100)            | 34-59                           | adults     | Self-report               | Ordinary/Fast/Very fast                             | Slow, very slow                                      | WC≥85cm, WC≥90cm,                                                                               | Ordinary: OR=1.72 (0.96–3.11)<br>OR=2.34 (1.08–5.05)<br>Fast: OR=3.13 (1.74–5.64)<br>OR=3.90 (1.82–8.34)<br>Very fast: OR=6.59 (2.37–18.48)<br>OR=5.22 (1.81–15.06)                                                                                                                                                                                                                                                                                                                                               |
| AESUN SHIN, et al <sup>35</sup>           | Cross-sectional study | Korea     | 7081(100)           | ≥30                             | adults     | Self-report               | Average/Fast                                        | Slow                                                 | MetS                                                                                            | Average: OR= 1.66 (1.19-2.32)<br>Fast: OR= 2.23 (1.60-3.12)                                                                                                                                                                                                                                                                                                                                                                                                                                                       |
| Xia Zeng, et al <sup>48</sup>             | Cross-sectional study | China     | 50037(51.1)         | 11.28±3.07                      | children   | Self-report               | Slow/Fast                                           | Medium                                               | Abdominal obesity, WHtR≥0.5                                                                     | Slow: OR=0.70 (0.65,0.75)<br>Fast: OR=1.51 (1.41,1.61)<br>OR=0.71 (0.65,0.78)<br>OR=1.54 (1.43,1.65)                                                                                                                                                                                                                                                                                                                                                                                                              |
| Rei Otsuka, et al <sup>57</sup>           | Cross-sectional study | Japan     | 3465(78.1)          | 35-69                           | adults     | Self-report               | Very slow/Relatively slow/Relatively Fast/Very fast | Medium                                               | Insulin resistance (HOMA-IR)                                                                    | P<0.01                                                                                                                                                                                                                                                                                                                                                                                                                                                                                                            |
| Hirota Ochiai, et al <sup>44</sup>        | Cross-sectional study | Japan     | 2136(50.3)          | 12-13                           | children   | Self-report               | Eating quickly                                      | Not Eating quickly                                   | WHtR ≥ 0.5                                                                                      | Boys: Eating quickly: OR=2.05 (1.31–3.23)<br>Girls: Eating quickly: OR=2.09 (1.15–3.81)                                                                                                                                                                                                                                                                                                                                                                                                                           |
| K.S. Lee, et al <sup>53</sup>             | Cross-sectional study | Korea     | 8775(54.9)          | 20-80                           | adults     | Self-report               | 10≤and <15 min/<br>5≤and <10 min/<5 min             | NA                                                   | Low HDL-C, High TG, High blood glucose, High blood pressure                                     | P<0.05                                                                                                                                                                                                                                                                                                                                                                                                                                                                                                            |
| Shiun Dong Hsieh, et al <sup>55</sup>     | Cross-sectional study | Japan     | 11195(74.0)         | men:51.6±9.4<br>women:52.9±10.1 | adults     | Self-report               | Eating rapidly                                      | Not eating until feeling full and not eating rapidly | Hypertension, Hyperglycaemia, Hypertriglyceridemia, Low HDL-C                                   | Men: OR= 1.36(1.22–1.51)<br>OR= 1.29(1.16–1.43)<br>OR= 1.43(1.27–1.61)<br>OR= 1.30(1.10–1.54)<br>Women: OR= 1.16(0.93–1.44)<br>OR= 1.37(1.07–1.73)<br>OR= 1.59(1.13–2.22)<br>OR= 1.26(0.95–1.68)                                                                                                                                                                                                                                                                                                                  |
| Alihiro Kudo, et al <sup>59</sup>         | Cohort study          | Japan     | 197825(38.0)        | 64                              | adults     | Self-report               | Fast                                                | Slow                                                 | Diabetes                                                                                        | OR=1.10(1.05-1.17)                                                                                                                                                                                                                                                                                                                                                                                                                                                                                                |
| Kazumasa Yamagishi, et al <sup>54</sup>   | Cohort Study          | Japan     | 1490(42.8)          | 6-12                            | children   | Self-report               | Never/ Quit/ Newly/ Continuous                      | NA                                                   | SBP                                                                                             | P=0.01                                                                                                                                                                                                                                                                                                                                                                                                                                                                                                            |
| Mizuki Saito, et al <sup>36</sup>         | Cross-sectional study | Japan     | 2379(40.35)         | 75-80                           | adults     | Self-report               | Normal/Fast                                         | Slow                                                 | MetS                                                                                            | Normal: OR=1.34(0.92-1.95)<br>Fast: OR=2.06(1.35-3.16)                                                                                                                                                                                                                                                                                                                                                                                                                                                            |
| Parvane Saneci, et al <sup>49</sup>       | Cross-sectional study | Iranian   | 7958(NA)            | NA                              | adults     | Self-report               | Moderate to slow/<br>Moderate to fast               | Moderate                                             | WC ≥80 cm for women and ≥94 cm for men<br>WC ≥88 cm for women and ≥102 cm for men               | Moderate to slow: OR=0.87 (0.73–1.05)<br>OR=0.86 (0.70–1.06)<br>Moderate to fast: OR=1.19 (0.95–1.49)<br>OR=1.07 (0.83–1.37)                                                                                                                                                                                                                                                                                                                                                                                      |
| Saleem Perwaiz Iqbal, et al <sup>38</sup> | Cross-sectional study | Malaysia  | 481(35.1)           | ≥18                             | adults     | Self-report               | Fast                                                | Not Fast                                             | Metabolic syndrome                                                                              | OR=1.15 (0.75–1.78)                                                                                                                                                                                                                                                                                                                                                                                                                                                                                               |
| Satsue Nagahama, et al <sup>50</sup>      | Cross-sectional study | Japan     | 56865(73.54)        | 17-99                           | adults     | Self-report               | Slow/Fast                                           | Normal                                               | Central obesity, High blood pressure, High fasting plasma glucose, High triglyceride, Low HDL-C | Men:<br>Slow: OR=0.63 (0.56-0.70)<br>OR=0.74 (0.68-0.81)<br>OR=0.78 (0.71-0.87)<br>OR=0.90 (0.82-0.98)<br>OR=0.83 (0.73-0.96)<br>Fast: OR=1.97 (1.88-2.07)<br>OR=1.20 (1.15-1.26)<br>OR=1.16 (1.11-1.22)<br>OR=1.33 (1.27-1.39)<br>OR=1.36 (1.28-1.45)<br>Women:<br>Slow: OR=0.73 (0.64-0.83)<br>OR=0.76 (0.65-0.88)<br>OR=1.03 (0.85-1.25)<br>OR=0.81 (0.66-1.00)<br>OR=0.89 (0.74-1.08)<br>Fast: OR=1.44 (1.33-1.56)<br>OR=1.10 (1.15-1.20)<br>OR=1.16 (1.03-1.31)<br>OR=1.13 (1.01-1.27)<br>OR=1.12(1.00-1.26) |
| Masaru Sakurai, et al <sup>58</sup>       | Cross-sectional study | Japan     | 2050(100)           | 45.9±6.0                        | adults     | Self-report               | Medium/Fast                                         | Slow                                                 | type 2 diabetes                                                                                 | Medium: OR=1.68 (0.93 - 3.02)<br>Fast: OR=1.97 (1.10 - 3.55)                                                                                                                                                                                                                                                                                                                                                                                                                                                      |

|                                              |                                |         |              |           |                 |                                |                                     |                            |                                                                                                                |                                                                                                                                                                                 |                                                                                                                                                |                                                          |
|----------------------------------------------|--------------------------------|---------|--------------|-----------|-----------------|--------------------------------|-------------------------------------|----------------------------|----------------------------------------------------------------------------------------------------------------|---------------------------------------------------------------------------------------------------------------------------------------------------------------------------------|------------------------------------------------------------------------------------------------------------------------------------------------|----------------------------------------------------------|
| Bing Zhu, et al <sup>39</sup>                | Cohort Study                   | Japan   | 8941(38.3)   | 63.7 ±7.9 | adults          | Self-report                    | Fast                                | Not fast                   | metabolic syndrome<br>WC, HDL-C, TG, BP, BG                                                                    | Fast: OR=1.3(1.05-1.60)<br>OR=1.35(1.10-1.66)<br>OR=1.37(1.12-1.67)<br>OR=1.15(0.99-1.31)<br>OR=1.10(0.94-1.27)<br>OR=0.93(0.75-1.16)                                           |                                                                                                                                                |                                                          |
| Indira Paz-Graniel, et al <sup>37</sup>      | Cross-sectional study          | Spain   | 792(42.93)   | 50-80     | adults          | Self-report                    | Medium/Fast                         | Slow                       | MetS, Central obesity,<br>Hypertriglyceridemia,<br>Low HDL-C, High Blood<br>Pressure,<br>High fasting glucose  | Fast: OR=0.99(0.86-1.14)<br>OR=0.95(0.87-1.04)<br>OR=1.47(1.08-2.02)<br>OR=0.94(0.68-1.30)<br>OR=1.00(0.97-1.04)<br>OR=0.92(0.80-1.06)                                          | Medium: OR=1.02 (0.88–1.18)<br>OR=1.00 (0.91–1.10)<br>OR=1.32 (0.95–1.85)<br>OR=0.96 (0.68–1.37)<br>OR=1.00 (0.96–1.03)<br>OR=1.00 (0.87–1.15) |                                                          |
| Daisuke Ekuni, et al <sup>43</sup>           | Cohort Study                   | Japan   | 141(53.19)   | 65.0 ±6.7 | adults          | Self-report                    | Intervention                        | Control                    | WC, SBP, DBP, Triglyceride,<br>High-density lipoprotein<br>cholesterol, Low-density<br>lipoprotein cholesterol | Waist circumference:<br>Systolic blood pressure:<br>Diastolic blood pressure:<br>Triglyceride:<br>High-density lipoprotein cholesterol:<br>Low-density lipoprotein cholesterol: | P<0.001<br>P<0.001<br>P=0.942<br>P=0.002<br>P=0.242<br>P=0.195                                                                                 |                                                          |
| Akiko Nanri, et al <sup>24</sup>             | Cohort Study                   | Japan   | 1018(88.41)  | 19-68     | adults          | Self-report                    | Slow/Fast                           | Medium                     | MetS, Central obesity<br>High blood pressure,<br>High fasting plasma glucose,<br>High triglyceride, Low HDL-C  | Slow: OR=0.93(0.34-2.53)<br>OR=0.65(0.37-1.13)<br>OR=0.70(0.45-1.10)<br>OR=0.93(0.51-1.68)<br>OR=0.68(0.38-1.23)<br>OR=0.52(0.27-1.01)                                          | Fast: OR=2.13 (1.23–3.68)<br>OR=1.64 (1.22–2.20)<br>OR=1.22 (0.93–1.59)<br>OR=1.24 (0.87–1.76)<br>OR=1.31 (0.95–1.81)<br>OR=0.96 (0.67–1.37)   |                                                          |
| T. Ohkuma, et al <sup>47</sup>               | Cross-sectional study          | Japan   | 7275(51.39)  | ≥40       | adults          | Self-report                    | Medium/Relatively<br>fast/Very fast | Slow                       | Elevated waist circumference<br>Elevated blood pressure                                                        | Normal glucose<br>Medium: OR=1.44 (1.07, 1.95)<br>OR=1.01 (0.74, 1.37)                                                                                                          | IFG<br>OR=1.97 (1.33, 2.92)<br>OR=1.28 (0.86, 1.90)                                                                                            | Diabetes<br>OR=0.89 (0.67, 1.17)<br>OR=1.17 (0.87, 1.57) |
| T. Ohkuma, et al <sup>47</sup>               | Cross-sectional study          | Japan   | 7275(51.39)  | ≥40       | adults          | Self-report                    | Medium/Relatively<br>fast/Very fast | Slow                       | Elevated waist circumference<br>Elevated blood pressure                                                        | Relatively fast:<br>OR=2.30 (1.62, 3.27)<br>OR=1.31 (0.93, 1.86)                                                                                                                | OR=1.84 (1.19, 2.86)<br>OR=1.60 (1.02, 2.51)                                                                                                   | OR=1.06 (0.74, 1.52)<br>OR=1.07 (0.74, 1.57)             |
| Ford AL, et al <sup>56</sup>                 | Randomised controlled<br>trial | England | 106(NA)      | 9-18      | children        | by a<br>computerised<br>device | Mandometer group                    | Standard care group        | HDL-C                                                                                                          |                                                                                                                                                                                 |                                                                                                                                                | P<0.05                                                   |
| Tajima Miki, et al <sup>22</sup>             | Cohort Study                   | Japan   | 3137(56.80)  | 47.5 ±9.1 | adults          | Self-report                    | Slow                                | Others                     | MetS                                                                                                           |                                                                                                                                                                                 |                                                                                                                                                | OR=0.49 (0.24-0.996)                                     |
| Radzevičienė, Lina, et al <sup>60</sup>      | A case-control study           | America | 234(39.28)   | 34-86     | adults          | Self-report                    | The same/Faster                     | Slow                       | Type 2 diabetes                                                                                                |                                                                                                                                                                                 |                                                                                                                                                | OR=2.52 (1.56-4.06)                                      |
| Hurst Yumi, et al <sup>52</sup>              | Cross-sectional study          | Japan   | 59717(100)   | 40-69     | adults          | Self-report                    | Slow/normal                         | Faster                     | WC                                                                                                             | Slow: OR= 0.58 ( 0.54 -0.63)<br>Normal: OR=0.71 (0.68 -0.75)                                                                                                                    |                                                                                                                                                |                                                          |
| Sonia Gómez-Martínez,<br>et al <sup>51</sup> | Cross-sectional study          | Spain   | 1978(48.58)  | 13-18.5   | adolesce<br>nts | Self-report                    | Quick                               | adequate                   | WC                                                                                                             | Boy: P<0.001<br>Girl: P=0.002                                                                                                                                                   |                                                                                                                                                |                                                          |
| Youji Sogai, et al <sup>40</sup>             | Cross-sectional study          | Japan   | 4,912(20.72) | 30-39     | adults          | Self-report                    | Fast                                | Not fast                   | MetS                                                                                                           | Men: OR=1.65(1.25-2.18)<br>Women:OR=2.07(1.50-2.85)                                                                                                                             |                                                                                                                                                |                                                          |
| Eiichi Ashizawa, et al <sup>42</sup>         | Cohort Study                   | Japan   | 8316(74.13)  | 20-64     | adults          | Self-report                    | After the intervention              | Before the<br>intervention | MetS<br>High blood pressure<br>diabetes                                                                        | Men: OR=0.84(0.70-1.00)<br>OR=0.98(0.84-1.20)<br>OR=0.76(0.59-0.96)<br>Women:OR=1.5(0.88-2.40)<br>OR=0.8(0.56-1.10)<br>OR=0.71(0.36-1.4)                                        |                                                                                                                                                |                                                          |
| Joe, Heegyung, et al <sup>41</sup>           | Cross-sectional study          | Korea   | 1005(0.00)   | 20-49     | adults          | Self-report                    | Fast                                | Not fast                   | MetS                                                                                                           |                                                                                                                                                                                 |                                                                                                                                                | P=0.017                                                  |

MetS, metabolic syndrome; BP, blood pressure; SBP, systolic blood pressure; DBP, Diastolic blood pressure; BG, blood glucose; FPG, fasting plasma glucose; TG, triglycerides; HDL, high-density lipoprotein; IFG, impaired fasting glucose; WC, waist circumference; WHtI, waist-to-height index; PI, periodontal index.

**Table S2. Assessment of the quality of 20 cross-sectional studies the Agency for Healthcare Research and Quality (AHRQ) scale.**

| Study                                     | 1 | 2 | 3 | 4 | 5 | 6 | 7 | 8 | 9 | 10 | 11 | Total points | Quality evaluation |
|-------------------------------------------|---|---|---|---|---|---|---|---|---|----|----|--------------|--------------------|
| Indira Paz-Graniel, et al <sup>37</sup>   | 1 | 0 | 1 | 0 | 1 | 0 | 1 | 0 | 1 | 1  | 1  | 7            | moderate           |
| Pey Sze Teo, et al <sup>45</sup>          | 1 | 0 | 1 | 1 | 0 | 1 | 1 | 0 | 1 | 1  | 1  | 8            | high               |
| Lixin Tao, et al <sup>23</sup>            | 1 | 0 | 1 | 0 | 0 | 1 | 1 | 1 | 1 | 1  | 1  | 8            | high               |
| Chikanobu Sonoda, et al <sup>46</sup>     | 1 | 1 | 1 | 1 | 0 | 0 | 0 | 1 | 0 | 0  | 1  | 6            | moderate           |
| AESUN SHIN, et al <sup>35</sup>           | 1 | 0 | 1 | 0 | 0 | 1 | 1 | 1 | 1 | 1  | 1  | 8            | high               |
| Xia Zeng, et al <sup>48</sup>             | 1 | 0 | 1 | 1 | 0 | 0 | 0 | 1 | 0 | 0  | 1  | 5            | moderate           |
| Rei Otsuka, et al <sup>57</sup>           | 1 | 0 | 1 | 0 | 0 | 1 | 1 | 1 | 0 | 1  | 1  | 7            | moderate           |
| Hirota Ochiai, et al <sup>44</sup>        | 1 | 0 | 1 | 0 | 0 | 1 | 1 | 1 | 0 | 1  | 1  | 7            | moderate           |
| K.S. Lee, et al <sup>53</sup>             | 1 | 0 | 1 | 0 | 0 | 1 | 1 | 0 | 0 | 1  | 1  | 6            | moderate           |
| Shiun Dong Hsieh, et al <sup>55</sup>     | 1 | 0 | 0 | 1 | 0 | 1 | 0 | 0 | 0 | 0  | 1  | 4            | moderate           |
| Mizuki Saito, et al <sup>36</sup>         | 1 | 0 | 1 | 0 | 0 | 1 | 0 | 1 | 0 | 0  | 1  | 5            | moderate           |
| T. Ohkuma, et al <sup>47</sup>            | 1 | 0 | 1 | 0 | 0 | 1 | 1 | 1 | 0 | 1  | 1  | 7            | moderate           |
| Parvane Saneci, et al <sup>49</sup>       | 1 | 1 | 1 | 0 | 0 | 1 | 0 | 1 | 0 | 1  | 1  | 6            | moderate           |
| Saleem Perwaiz Iqbal, et al <sup>38</sup> | 1 | 1 | 1 | 0 | 0 | 1 | 1 | 1 | 0 | 0  | 1  | 7            | moderate           |
| Hurst Yumi, et al <sup>52</sup>           | 1 | 1 | 1 | 0 | 0 | 1 | 1 | 1 | 0 | 0  | 1  | 7            | moderate           |
| Satsue Nagahama, et al <sup>50</sup>      | 1 | 0 | 1 | 0 | 0 | 1 | 1 | 1 | 1 | 0  | 1  | 7            | moderate           |
| Masaru Sakurai, et al <sup>58</sup>       | 1 | 0 | 1 | 0 | 0 | 1 | 0 | 1 | 0 | 0  | 1  | 5            | moderate           |
| Sonia GÓmez-MartÍnez, et al <sup>51</sup> | 1 | 0 | 1 | 0 | 0 | 1 | 1 | 0 | 1 | 0  | 1  | 6            | moderate           |
| Youji Sogai, et al <sup>40</sup>          | 1 | 1 | 1 | 0 | 0 | 0 | 1 | 0 | 0 | 1  | 0  | 5            | moderate           |
| Joe, Heegyung, et al <sup>41</sup>        | 1 | 1 | 1 | 0 | 0 | 0 | 1 | 1 | 1 | 1  | 0  | 7            | moderate           |

**Table S3. Assessment of the quality of 7 cohort studies and 1 case-control study by Newcastle-Ottawa Scale (NOS).**

| Cohort study                            | Selection                        |                                     |                           | Comparability                                                            |               |                       | Outcomes                                    |                                  |   | total quality evaluation |
|-----------------------------------------|----------------------------------|-------------------------------------|---------------------------|--------------------------------------------------------------------------|---------------|-----------------------|---------------------------------------------|----------------------------------|---|--------------------------|
|                                         | representativeness of the cohort | Selection of the non-exposed cohort | ascertainment of exposure | demonstration that outcome of interest was not present at start of study | comparability | assessment of outcome | follow-up long enough for outcomes to occur | adequacy of follow up of cohorts |   |                          |
| Alihiro Kudo, et al <sup>59</sup>       | 1                                | 1                                   | 1                         | 1                                                                        | 1             | 1                     | 1                                           | +1                               | 8 | high                     |
| Kazumasa Yamagishi, et al <sup>54</sup> | 1                                | 1                                   | 1                         | -                                                                        | 1             | 1                     | 1                                           | -                                | 6 | moderate                 |
| Bing Zhu, et al <sup>39</sup>           | 1                                | 1                                   | 1                         | 1                                                                        | 2             | 1                     | 1                                           | +1                               | 9 | high                     |
| Daisuke Ekuni, et al <sup>43</sup>      | 1                                | 1                                   | 1                         | -                                                                        | 1             | 1                     | 1                                           | +1                               | 7 | high                     |
| Akiko Nanri, et al <sup>24</sup>        | 1                                | 1                                   | 1                         | 1                                                                        | 2             | 1                     | 1                                           | +1                               | 9 | high                     |
| Tajima Miki, et al <sup>22</sup>        | 1                                | 1                                   | 1                         | 1                                                                        | 1             | 1                     | 1                                           | +1                               | 8 | high                     |
| Eiichi Ashizawa, et al <sup>42</sup>    | 1                                | 1                                   | 1                         | -                                                                        | 1             | 1                     | 1                                           | +1                               | 7 | high                     |

  

| Case-control study                      | case definition | Representativeness | control selection | Control definition | comparability | assessment of exposure | Same method of ascertainment for cases and controls | Non-Response rate | total quality evaluation |
|-----------------------------------------|-----------------|--------------------|-------------------|--------------------|---------------|------------------------|-----------------------------------------------------|-------------------|--------------------------|
| Radzevičienė, Lina, et al <sup>60</sup> | 1               | 1                  | -                 | 1                  | 1             | 1                      | 1                                                   | -                 | 6 moderate               |

**Table S4. Assessment of the quality of 1 randomised controlled trial by Cochrane scale.**

| Study                        | Random Sequence Generation | Allocation Concealment | Blind        | Incomplete Outcome Data | Selective Reporting | Other Sources of Bias |
|------------------------------|----------------------------|------------------------|--------------|-------------------------|---------------------|-----------------------|
| Ford AL, et al <sup>56</sup> | randomisation lists        | Unclear                | Single blind | Complete                | Low risk            | Unclear               |

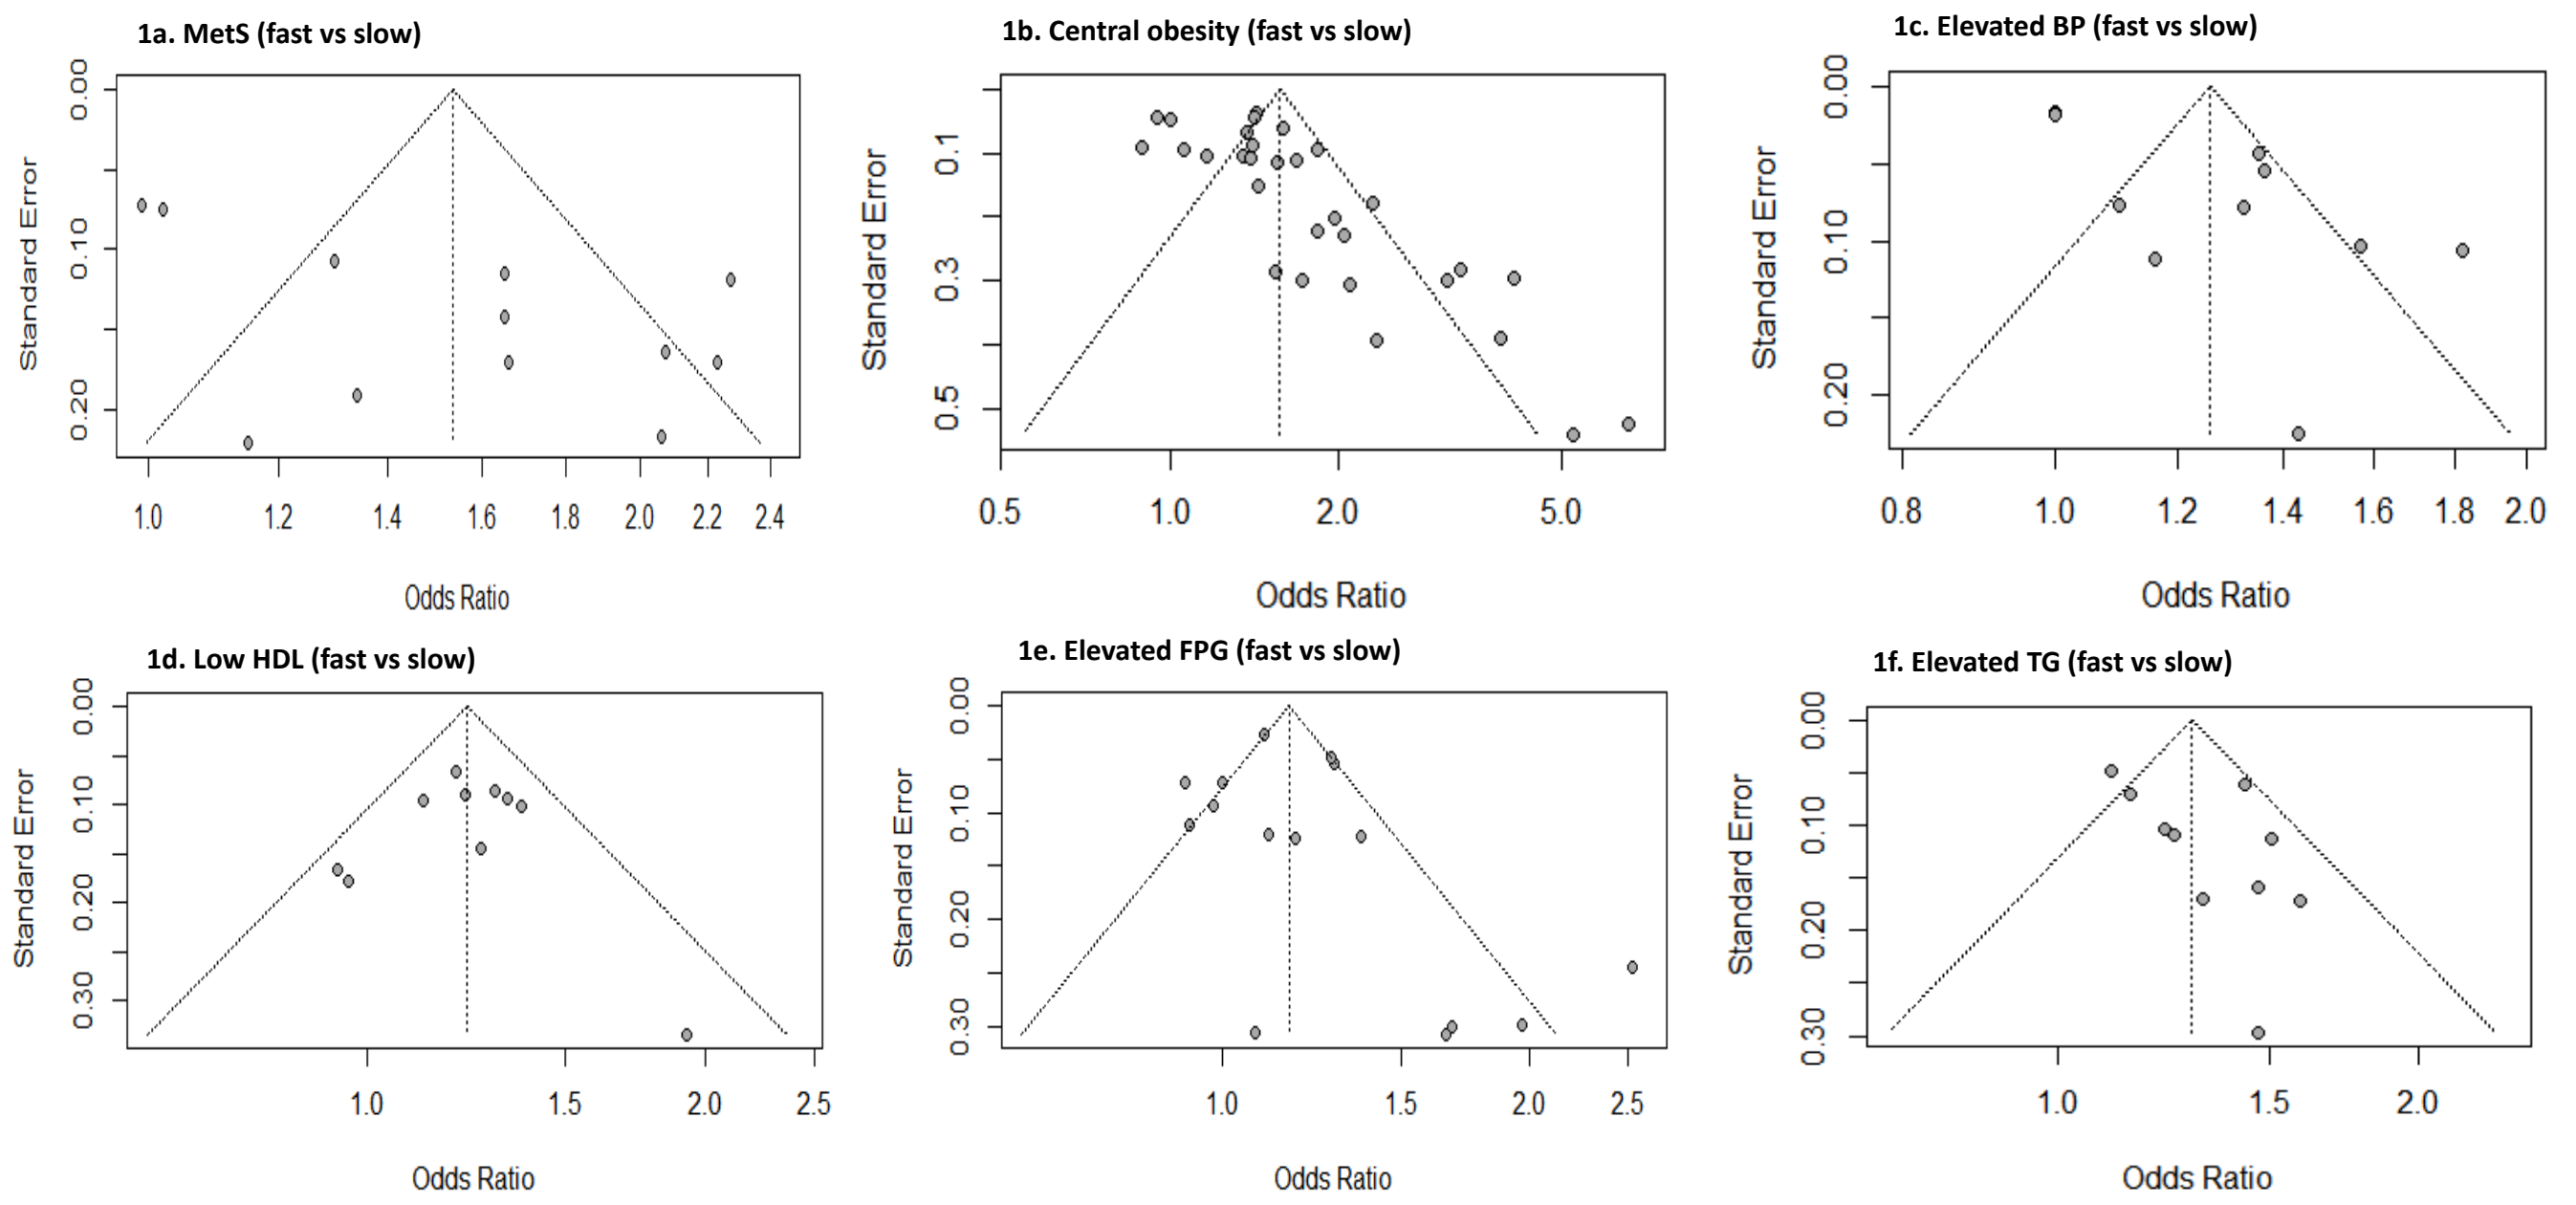

**Figure S1.** Begg's funnel plots of the included studies in the meta-analysis. (Only when the number of included studies was more than 5, the Begg's test and plot were conducted. MetS, metabolic syndrome; BP, blood pressure; FPG, fasting plasma glucose; TG, triglycerides; HDL, high-density lipoprotein)

**Table S5. Begg's test and Egger's test of the included studies in the meta-analysis**

| Outcomes                                                     | Sample size | Eating speed | OR   | 95%CI     | Begg's test<br>P value | Egger's test<br>P value |
|--------------------------------------------------------------|-------------|--------------|------|-----------|------------------------|-------------------------|
|                                                              |             | slow         | Ref  |           |                        |                         |
| MetS<br>7 studies <sup>23,35-40</sup>                        | 32558       | faster       | 1.54 | 1.27-1.86 | 0.337                  | 0.014                   |
| Central obesity<br>11 studies <sup>23,24,37,39,44-50</sup>   | 150868      | faster       | 1.54 | 1.37-1.73 | 0.019                  | 0.001                   |
| Elevated BP<br>6 studies <sup>23,24,37,39,50,55</sup>        | 86783       | faster       | 1.26 | 1.13-1.40 | 0.421                  | 0.006                   |
| Low HDL<br>6 studies <sup>23,24,37,39,50,55</sup>            | 86783       | faster       | 1.23 | 1.15-1.37 | 0.929                  | 0.898                   |
| Elevated FPG<br>9 studies <sup>23,24,37,39,50,55,58-60</sup> | 286892      | faster       | 1.16 | 1.06-1.27 | 0.347                  | 0.056                   |
| Elevated TG<br>6 studies <sup>23,24,37,39,50,55</sup>        | 86783       | faster       | 1.29 | 1.18-1.42 | 0.180                  | 0.115                   |

MetS, metabolic syndrome; BP, blood pressure; FPG, fasting plasma glucose; TG, triglycerides; HDL, high-density lipoprotein.

**1a. MetS (Fast eating)**

| Study (n=32558)                                  | Odds Ratio  | OR          | 95%-CI              |
|--------------------------------------------------|-------------|-------------|---------------------|
| Omitting Saleem Perwaiz Iqbal, et al(2020)       | 1.57        | 1.57        | [1.28; 1.92]        |
| Omitting Bing Zhu, et al(2015)                   | 1.56        | 1.56        | [1.26; 1.94]        |
| Omitting Lixin Tao, et al(2018)(Fast)            | 1.47        | 1.47        | [1.23; 1.77]        |
| Omitting ESUN SHIN, et al(2009)(Fast)            | 1.49        | 1.49        | [1.22; 1.81]        |
| Omitting Mizuki Saito, et al(2017)(Fast)         | 1.50        | 1.50        | [1.23; 1.83]        |
| Omitting Indira Paz-Graniel, et al(2019)(Medium) | 1.60        | 1.60        | [1.31; 1.96]        |
| Omitting Lixin Tao, et al(2018)(Medium)          | 1.53        | 1.53        | [1.24; 1.88]        |
| Omitting ESUN SHIN, et al(2009)(Medium)          | 1.53        | 1.53        | [1.24; 1.87]        |
| Omitting Mizuki Saito, et al(2017)(Medium)       | 1.55        | 1.55        | [1.26; 1.91]        |
| Omitting Indira Paz-Graniel, et al(2019)(Fast)   | 1.61        | 1.61        | [1.33; 1.95]        |
| Omitting Youji Sogai, et al(2013)(Men)           | 1.53        | 1.53        | [1.24; 1.88]        |
| Omitting Youji Sogai, et al(2013)(Women)         | 1.49        | 1.49        | [1.23; 1.82]        |
| <b>Random effects model</b>                      | <b>1.54</b> | <b>1.54</b> | <b>[1.27; 1.86]</b> |

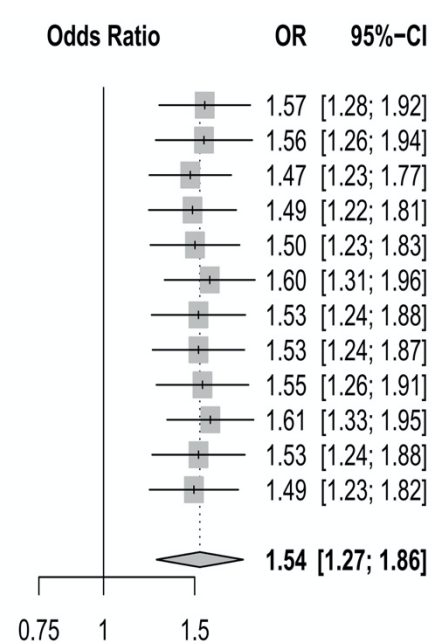

**1b. Central obesity (Fast eating)**

| Study (n=150868)                                           | Odds Ratio  | OR          | 95%-CI              |
|------------------------------------------------------------|-------------|-------------|---------------------|
| Omitting Hirotsuka Ochiai, et al(2016)(boy)                | 1.56        | 1.56        | [1.40; 1.74]        |
| Omitting Hirotsuka Ochiai, et al(2016)(girl)               | 1.56        | 1.56        | [1.40; 1.74]        |
| Omitting Bing Zhu, et al(2015)                             | 1.59        | 1.59        | [1.42; 1.77]        |
| Omitting Pey Sze Teo, et al(2020)(Fast)                    | 1.56        | 1.56        | [1.40; 1.74]        |
| Omitting Lixin Tao, et al(2018)(Fast)                      | 1.57        | 1.57        | [1.40; 1.75]        |
| Omitting Indira Paz-Graniel, et al(2019)(Medium)           | 1.60        | 1.60        | [1.44; 1.79]        |
| Omitting T. Ohkuma & H. Fujii, et al(2012)(Normal glucose) | 1.55        | 1.55        | [1.39; 1.72]        |
| Omitting T. Ohkuma & H. Fujii, et al(2012)(IFG)            | 1.57        | 1.57        | [1.40; 1.75]        |
| Omitting T. Ohkuma & H. Fujii, et al(2012)(Diabetes)       | 1.60        | 1.60        | [1.43; 1.79]        |
| Omitting Chikanobu Sonoda, et al(2018)(WC>=85)             | 1.55        | 1.55        | [1.39; 1.72]        |
| Omitting Chikanobu Sonoda, et al(2018)(WC>=90)             | 1.55        | 1.55        | [1.39; 1.72]        |
| Omitting Chikanobu Sonoda, et al(2018)(WC>=85)             | 1.55        | 1.55        | [1.39; 1.72]        |
| Omitting Chikanobu Sonoda, et al(2018)(WC>=90)             | 1.55        | 1.55        | [1.40; 1.73]        |
| Omitting T. Ohkuma & H. Fujii, et al(2012)(Normal glucose) | 1.54        | 1.54        | [1.39; 1.72]        |
| Omitting T. Ohkuma & H. Fujii, et al(2012)(IFG)            | 1.53        | 1.53        | [1.38; 1.71]        |
| Omitting T. Ohkuma & H. Fujii, et al(2012)(Diabetes)       | 1.58        | 1.58        | [1.41; 1.76]        |
| Omitting Chikanobu Sonoda, et al(2018)(WC>=85)             | 1.57        | 1.57        | [1.41; 1.75]        |
| Omitting Chikanobu Sonoda, et al(2018)(WC>=90)             | 1.56        | 1.56        | [1.40; 1.74]        |
| Omitting T. Ohkuma & H. Fujii, et al(2012)(Normal glucose) | 1.58        | 1.58        | [1.41; 1.76]        |
| Omitting T. Ohkuma & H. Fujii, et al(2012)(IFG)            | 1.56        | 1.56        | [1.40; 1.74]        |
| Omitting T. Ohkuma & H. Fujii, et al(2012)(Diabetes)       | 1.61        | 1.61        | [1.44; 1.79]        |
| Omitting Pey Sze Teo, et al(2020)(Medium)                  | 1.59        | 1.59        | [1.42; 1.77]        |
| Omitting Lixin Tao, et al(2018)(Medium)                    | 1.58        | 1.58        | [1.42; 1.77]        |
| Omitting XiaZeng, et al(2018)(WC percentile<=90th)         | 1.60        | 1.60        | [1.42; 1.80]        |
| Omitting XiaZeng, et al(2018)(WHR<=0.5)                    | 1.60        | 1.60        | [1.42; 1.79]        |
| Omitting Farvane Saneel, et al(2015)                       | 1.60        | 1.60        | [1.43; 1.78]        |
| Omitting Satsue Nagahama, et al(2014)(men)                 | 1.59        | 1.59        | [1.41; 1.76]        |
| Omitting Satsue Nagahama, et al(2014)(women)               | 1.59        | 1.59        | [1.42; 1.78]        |
| Omitting Nanri Akiko, et al(2020)                          | 1.57        | 1.57        | [1.41; 1.75]        |
| Omitting Indira Paz-Graniel, et al(2019)(Fast)             | 1.59        | 1.59        | [1.44; 1.77]        |
| <b>Random effects model</b>                                | <b>1.57</b> | <b>1.57</b> | <b>[1.41; 1.75]</b> |

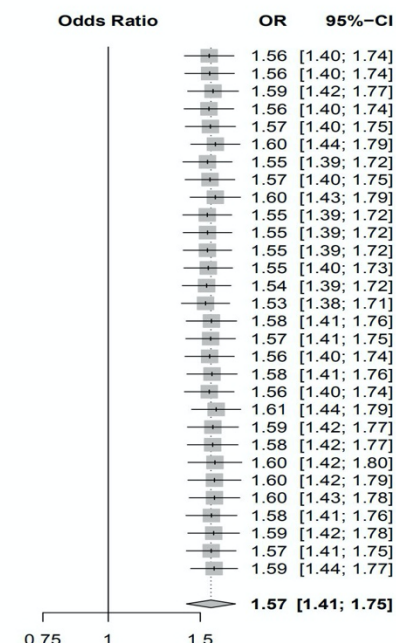

**1c. Elevated BP (Fast eating)**

| Study (n=86783)                                  | Odds Ratio  | OR          | 95%-CI              |
|--------------------------------------------------|-------------|-------------|---------------------|
| Omitting Shiun Dong Hsieh, et al(2010)(Men)      | 1.24        | 1.24        | [1.11; 1.38]        |
| Omitting Shiun Dong Hsieh, et al(2010)(Women)    | 1.27        | 1.27        | [1.13; 1.42]        |
| Omitting Bing Zhu, et al(2015)                   | 1.28        | 1.28        | [1.14; 1.43]        |
| Omitting Lixin Tao, et al(2018)(Fast)            | 1.21        | 1.21        | [1.09; 1.34]        |
| Omitting Indira Paz-Graniel, et al(2019)(Fast)   | 1.31        | 1.31        | [1.13; 1.52]        |
| Omitting Lixin Tao, et al(2018)(Medium)          | 1.23        | 1.23        | [1.10; 1.37]        |
| Omitting Indira Paz-Graniel, et al(2019)(Medium) | 1.31        | 1.31        | [1.13; 1.52]        |
| Omitting Nanri Akiko, et al(2020)                | 1.25        | 1.25        | [1.12; 1.39]        |
| Omitting Satsue Nagahama, et al(2014)(men)       | 1.24        | 1.24        | [1.12; 1.38]        |
| Omitting Satsue Nagahama, et al(2014)(women)     | 1.25        | 1.25        | [1.12; 1.40]        |
| <b>Random effects model</b>                      | <b>1.26</b> | <b>1.26</b> | <b>[1.13; 1.40]</b> |

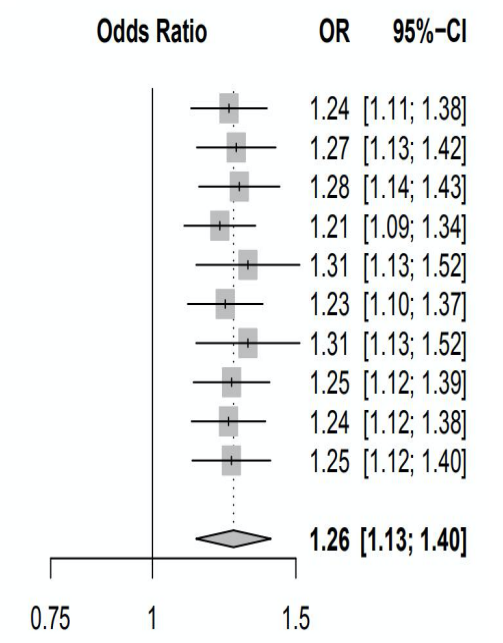

**1d. Low HDL (Fast eating)**

| Study (n=86783)                                  | Odds Ratio  | OR          | 95%-CI              |
|--------------------------------------------------|-------------|-------------|---------------------|
| Omitting Shiun Dong Hsieh, et al(2010)(Men)      | 1.21        | 1.21        | [1.12; 1.31]        |
| Omitting Shiun Dong Hsieh, et al(2010)(Women)    | 1.22        | 1.22        | [1.13; 1.32]        |
| Omitting Bing Zhu, et al(2015)                   | 1.21        | 1.21        | [1.13; 1.30]        |
| Omitting Lixin Tao, et al(2018)(Fast)            | 1.21        | 1.21        | [1.13; 1.30]        |
| Omitting Indira Paz-Graniel, et al(2019)(Medium) | 1.24        | 1.24        | [1.16; 1.32]        |
| Omitting Lixin Tao, et al(2018)(Medium)          | 1.23        | 1.23        | [1.13; 1.33]        |
| Omitting Indira Paz-Graniel, et al(2019)(Fast)   | 1.24        | 1.24        | [1.16; 1.32]        |
| Omitting Nanri Akiko, et al(2020)                | 1.22        | 1.22        | [1.15; 1.30]        |
| Omitting Satsue Nagahama, et al(2014)(men)       | 1.23        | 1.23        | [1.13; 1.34]        |
| Omitting Satsue Nagahama, et al(2014)(women)     | 1.24        | 1.24        | [1.15; 1.33]        |
| <b>Random effects model</b>                      | <b>1.23</b> | <b>1.23</b> | <b>[1.15; 1.31]</b> |

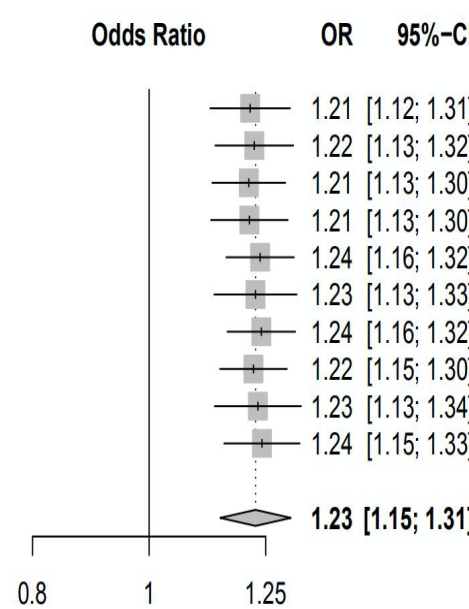

**1e. Elevated TG (Fast eating)**

| Study (n=86783)                               | Odds Ratio  | OR          | 95%-CI              |
|-----------------------------------------------|-------------|-------------|---------------------|
| Omitting Bing Zhu, et al(2015)                | 1.32        | 1.32        | [1.19; 1.47]        |
| Omitting Shiun Dong Hsieh, et al(2010)(Men)   | 1.26        | 1.26        | [1.15; 1.37]        |
| Omitting Shiun Dong Hsieh, et al(2010)(Women) | 1.28        | 1.28        | [1.17; 1.40]        |
| Omitting Lixin Tao, et al(2018)               | 1.27        | 1.27        | [1.16; 1.39]        |
| Omitting Indira Paz-Graniel, et al(2019)      | 1.28        | 1.28        | [1.17; 1.41]        |
| Omitting Lixin Tao, et al(2018)               | 1.30        | 1.30        | [1.18; 1.44]        |
| Omitting Nanri Akiko, et al(2020)             | 1.29        | 1.29        | [1.18; 1.42]        |
| Omitting Satsue Nagahama, et al(2014) (men)   | 1.33        | 1.33        | [1.23; 1.44]        |
| Omitting Satsue Nagahama, et al(2014) (women) | 1.31        | 1.31        | [1.18; 1.45]        |
| Omitting Indira Paz-Graniel, et al(2019)      | 1.30        | 1.30        | [1.17; 1.43]        |
| <b>Random effects model</b>                   | <b>1.29</b> | <b>1.29</b> | <b>[1.18; 1.42]</b> |

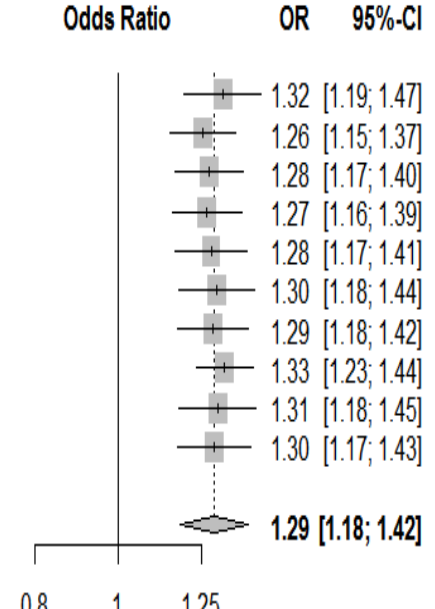

**1f. Elevated FPG (Fast eating)**

| Study (n=286892)                              | Odds Ratio  | OR          | 95%-CI              |
|-----------------------------------------------|-------------|-------------|---------------------|
| Omitting Shiun Dong Hsieh, et al(2010)(Men)   | 1.15        | 1.15        | [1.04; 1.27]        |
| Omitting Shiun Dong Hsieh, et al(2010)(Women) | 1.15        | 1.15        | [1.05; 1.26]        |
| Omitting Bing Zhu, et al(2015)                | 1.18        | 1.18        | [1.08; 1.30]        |
| Omitting Ahihiro Kudo, et al(2019)            | 1.19        | 1.19        | [1.06; 1.33]        |
| Omitting Lixin Tao, et al(2018)               | 1.16        | 1.16        | [1.06; 1.28]        |
| Omitting Masaru Sakurai, et al(2012)          | 1.15        | 1.15        | [1.05; 1.26]        |
| Omitting Indira Paz-Graniel, et al(2019)      | 1.18        | 1.18        | [1.08; 1.30]        |
| Omitting Radzeviciene, Lina, et al(2021)      | 1.13        | 1.13        | [1.04; 1.23]        |
| Omitting Lixin Tao, et al(2018)               | 1.17        | 1.17        | [1.06; 1.29]        |
| Omitting Masaru Sakurai, et al(2012)          | 1.15        | 1.15        | [1.05; 1.26]        |
| Omitting Indira Paz-Graniel, et al(2019)      | 1.19        | 1.19        | [1.09; 1.30]        |
| Omitting Radzeviciene, Lina, et al(2021)      | 1.16        | 1.16        | [1.06; 1.26]        |
| Omitting Nanri Akiko, et al(2020)             | 1.17        | 1.17        | [1.06; 1.28]        |
| Omitting Satsue Nagahama, et al(2014) (men)   | 1.15        | 1.15        | [1.04; 1.27]        |
| Omitting Satsue Nagahama, et al(2014) (women) | 1.18        | 1.18        | [1.08; 1.30]        |
| <b>Random effects model</b>                   | <b>1.16</b> | <b>1.16</b> | <b>[1.06; 1.27]</b> |

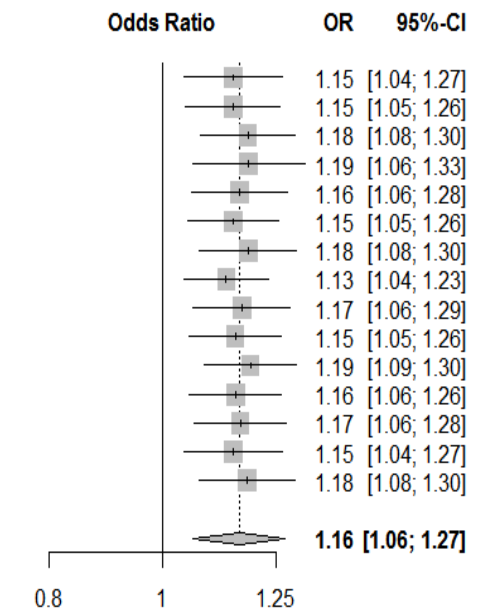

**Figure S2.** Sensitivity analysis of the included studies in the meta-analysis. (The slow eating group was used as the reference group. MetS, metabolic syndrome; BP, blood pressure; FPG, fasting plasma glucose; TG, triglycerides; HDL, high-density lipoprotein)



**Table S6. Meta-regression models of multivariable adjusted analyses**

| Outcomes        | Variables    | <i>P</i> | Regression coefficients (95% CI) | Tau <sup>2</sup> | I <sup>2</sup> residual (%) |
|-----------------|--------------|----------|----------------------------------|------------------|-----------------------------|
| MetS            | Location     | 0.003    | -0.53(-0.84; -0.22)              | 0.02             | 54.32                       |
|                 | Speed        | 0.371    | 0.18(-0.24; 0.61)                | 0.08             | 86.11                       |
|                 | Study design | 0.586    | -0.18(-0.90; 0.54)               | 0.08             | 87.23                       |
| Central Obesity | Location     | 0.606    | -0.04(-0.20; 0.12)               | 0.13             | 87.99                       |
|                 | Speed        | 0.002    | 0.33(0.13; 0.53)                 | 0.09             | 87.67                       |
|                 | Study design | 0.608    | -0.03(-0.54; 0.47)               | 0.12             | 88.04                       |
|                 | Gender       | 0.002    | 0.72(0.28; 1.17)                 | 0.08             | 86.31                       |
|                 | Age          | 0.810    | 0.17(-1.81; 0.14)                | 0.12             | 87.39                       |
| Elevated BP     | Location     | 0.010    | -0.30(-0.51; -0.01)              | 0.01             | 58.38                       |
|                 | Speed        | 0.784    | -0.04(-0.35; 0.27)               | 0.04             | 93.53                       |
|                 | Study design | 0.729    | -0.07 (-0.49; 0.36)              | 0.04             | 93.52                       |
| Elevated TG     | Location     | 0.566    | 0.07(-0.22; 0.37)                | 0.01             | 54.66                       |
|                 | Speed        | 0.139    | 0.21(0.06; 0.36)                 | 0.01             | 35.24                       |
|                 | Study design | 0.426    | -0.20(-0.400; 0.01)              | 0.01             | 53.95                       |
| Elevated FPG    | Location     | 0.942    | -0.12(-0.33; -0.31)              | 0.03             | 70.61                       |
|                 | Speed        | 0.719    | 0.05(-0.23; 0.33)                | 0.03             | 74.09                       |
|                 | Study design | 0.239    | -0.13(-0.10; 0.35)               | 0.03             | 74.03                       |
|                 | Gender       | 0.003    | 0.35(0.14; 0.56)                 | 0.01             | 62.66                       |

MetS, Metabolic syndrome; BP, blood pressure; FPG, fasting plasma glucose; TG, triglyceride.
